# Supplementary material
Source: JCI journal article supplement (doi:10.1172/jci170340)
Supplement: sd1 [file 1]

## Supplementary information

### Supplementary Table 1-2

#### Supplementary Table 1, Summary of antibodies used in this study

| <b>ID</b>                             | <b>Company</b>               | <b>Cat</b>  | <b>Clone number</b> |
|---------------------------------------|------------------------------|-------------|---------------------|
| SHP2                                  | CST                          | 3397S       | D50F2               |
| ERK                                   | CST                          | 4695        | 137F5               |
| p-ERK                                 | CST                          | 4370        | D13.14.4E           |
| Vimentin                              | Abcam                        | Ab193555    | EPR3776             |
| $\alpha$ -SMA                         | Abcam                        | Ab32575     | E184                |
| Desmin                                | Abcam                        | Ab15200     | Polyclonal          |
| Ki-67                                 | Abcam                        | Ab15580     | Polyclonal          |
| p-AKT                                 | CST                          | 4060        | D9E                 |
| AKT                                   | CST                          | 2920        | 40D4                |
| p-mTOR                                | Invitrogen                   | SB233656A   | Polyclonal          |
| mTOR                                  | Invitrogen                   | PA5-34663   | Polyclonal          |
| HIF1 $\alpha$                         | Invitrogen                   | MA1-16504   | H1alpha67           |
| $\beta$ -Actin                        | CST                          | 3700        | 8H10D10             |
| $\beta$ -Tubulin                      | Invitrogen                   | 32-2600     | 2 28 33             |
| HSP60                                 | Invitrogen                   | PA5-34760   | Polyclonal          |
| OXPPOS Rodent WB<br>Antibody Cocktail | Thermo                       | 45-8099     | Cocktail            |
| NDUFB8                                | Abcam                        | Ab251160    | EPR15961            |
| UQCRC2                                | Abcam                        | Ab240368    | EPR13051            |
| AMPK                                  | CST                          | 5831        | D5A2                |
| p-AMPK                                | CST                          | 50081       | D4D6D               |
| S6                                    | CST                          | 2217        | 5G10                |
| p-S6                                  | CST                          | 4858        | D57.2.2E            |
| ACC                                   | CST                          | 3662        | Polyclonal          |
| p-ACC                                 | CST                          | 3661        | Ser79               |
| IBA1                                  | CST                          | 17198       | E4O4W               |
| CD133                                 | Invitrogen                   | PA5-38014   | Polyclonal          |
| CD133-APC                             | Biolegend                    | 141208      | 315-2C11            |
| Frizzled-1<br>anti-mouse, PE          | Antibody,<br>Miltenyi Biotec | 130-112-397 | REA603              |
| CD271- Alexa Fluor™<br>488            | eBioscience                  | 53-9400-42  | ME20.4              |
| CD184-PE                              | Biolegend                    | 146505      | L276F12             |
| S100A4                                | Abcam                        | Ab218512    | S100A4/1482         |
| MyoD1                                 | CST                          | 13812       | D8G3                |

|               |            |            |            |
|---------------|------------|------------|------------|
| Myogenin      | Invitrogen | 14-5643-80 | F5D        |
| Caldesmon     | Thermo     | PA5-27719  | Polyclonal |
| S100- $\beta$ | Abcam      | Ab52642    | EP1576Y    |
| Sox9          | Thermo     | PA5-81966  | Polyclonal |
| Aggrecan      | Thermo     | MA5-42646  | 6L4T2      |

**Supplementary Table 2, Summary of primers used in this study**

| Primer ID                         | Sequence (5' to 3')     |
|-----------------------------------|-------------------------|
| <i>Neo-F</i>                      | TACCTTGAGGTTAGTGAACGTCA |
| <i>Neo-R</i>                      | CGCTCTCGTTTTCCCCATAATC  |
| <i><math>\beta</math>-actin-F</i> | GGCTGTATTCCCCTCCATCG    |
| <i><math>\beta</math>-actin-R</i> | CCAGTTGGTAACAATGCCATGT  |
| <i>18s-F</i>                      | TAGAGGGACAAGTGGCGTTC    |
| <i>18s-R</i>                      | CGCTGAGCCAGTCAGTGT      |
| <i>CytB-F</i>                     | CCACTCATTGACCTACCT      |
| <i>CytB-R</i>                     | GCTCCGTTTGCGTGTATATATC  |

## Supplemental Figures 1-15

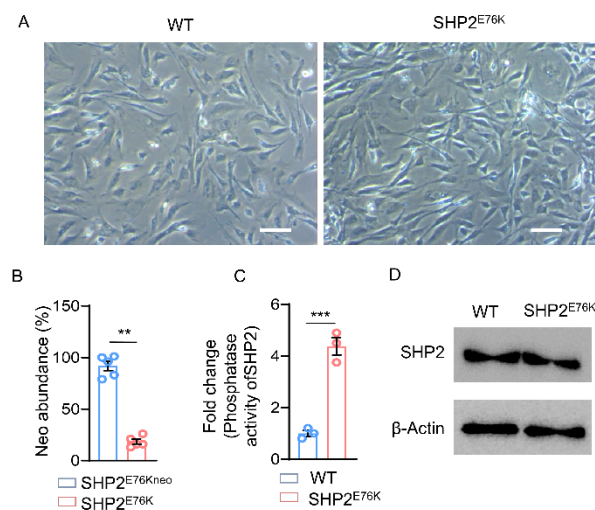

**Supplemental Figure 1. Measurement of Mx1-cre-mediated recombination in WT and SHP2<sup>E76K</sup> MSCs.** **A** Representative image of WT and SHP2<sup>E76K</sup> MSCs in culture. **B** Statistical analysis of neo abundance in MSCs expressing SHP2<sup>E76K-neo</sup> or SHP2<sup>E76K</sup> (n=5 per group). Data are represented as the means ± SD. \*\**p* < 0.01 (two-tailed unpaired t test). **C** Statistical analysis of SHP2 phosphatase activity in WT and SHP2<sup>E76K</sup> MSCs (n=3 per group). Data are represented as the means ± SD. \*\*\**p* < 0.001 (two-tailed unpaired t test). **D** Western blot analysis of SHP2 expression in Mx1-cre and Mx1-cre; SHP2<sup>E76K</sup> mouse MSCs.

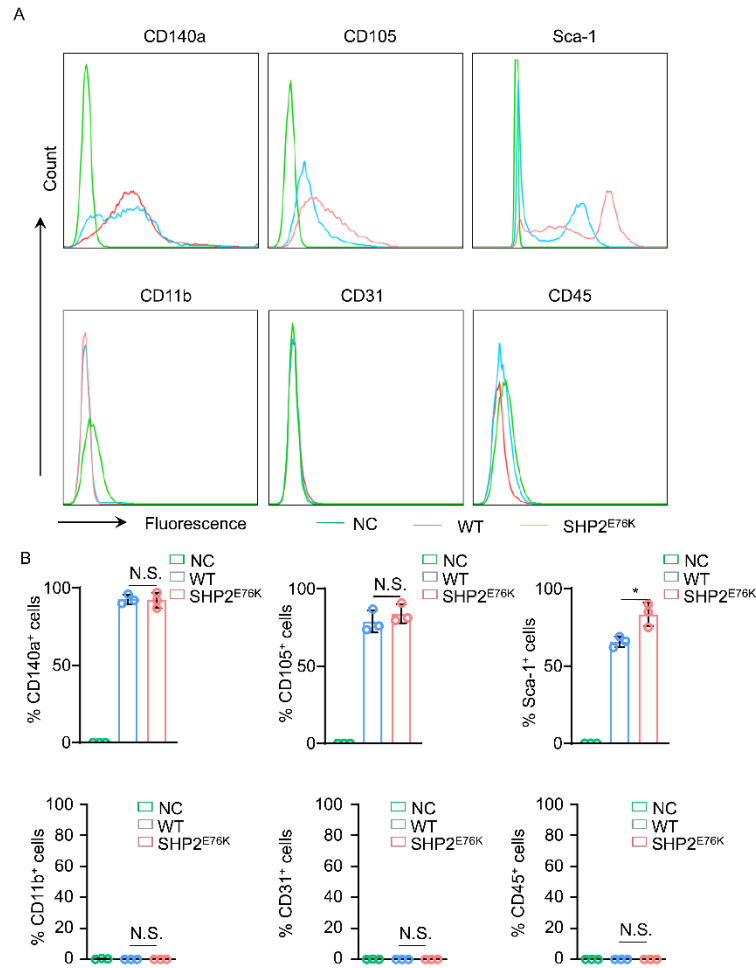

**Supplemental Figure 2. Characterization of WT and SHP2<sup>E76K</sup> MSCs.** **A** Flow cytometry validation of MSCs using different markers, including CD140a, CD105, Sca1, CD11b, CD31 and CD45. **B** Statistical analysis of the population of CD140a<sup>+</sup>, CD105<sup>+</sup>, Sca1<sup>+</sup>, CD11b<sup>+</sup>, CD31<sup>+</sup> or CD45<sup>+</sup> cells among WT and SHP2<sup>E76K</sup> MSCs (n=3 per group). Data are represented as the means  $\pm$  SD. \* $p < 0.05$ , N.S. indicates no significance (two-tailed unpaired t test). indicates no significance (two-tailed unpaired t test).

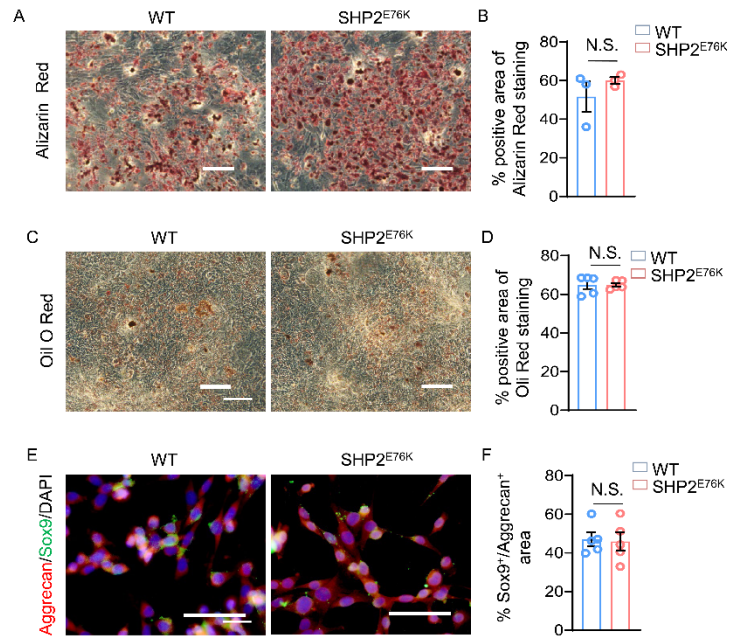

**Supplemental Figure 3. There was no significant difference in trilineage differentiation capacity between WT and SHP2<sup>E76K</sup> MSCs. A, B** Representative images (A) and statistical analysis (B) of Alizarin Red staining in MSCs with or without GOF mutant SHP2 (n=3 per group). Data are represented as the means ± SD. N.S. indicates no significance (two-tailed unpaired t test). Scale bar, 200 μm. **C, D** Representative images (C) and statistical analysis of Oil Red O staining (D) in MSCs with or without GOF mutant SHP2 (n=5 per group). Data are represented as the means ± SD, N.S. indicates no significance (two-tailed unpaired t test). Scale bar, 100 μm. **E, F** Representative IF images (E) and statistical analysis (F) of the SOX9<sup>+</sup>/Aggrecan<sup>+</sup> area in MSCs with or without GOF mutant SHP2 (n=5 per group). Data are represented as the means ± SD, N.S. indicates no significance (two-tailed unpaired t test). Scale bar, 200 μm.

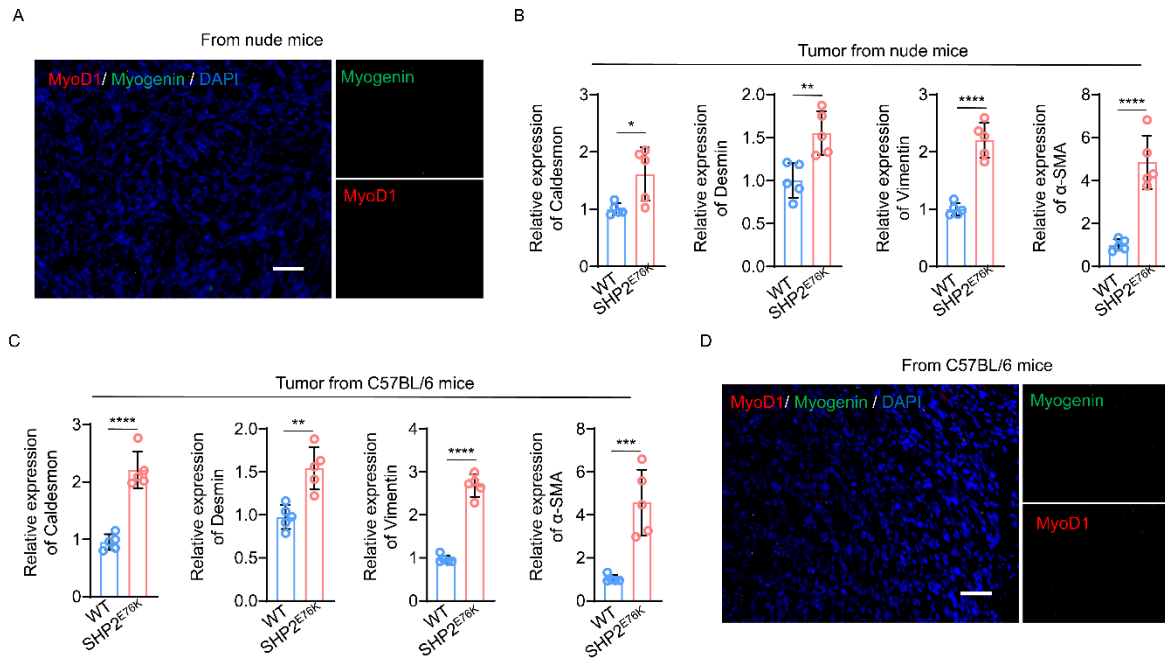

**Supplemental Figure 4. SHP2<sup>E76K</sup> MSC-initiated sarcomas did not express MyoD1 and Myogenin. A** Representative immunofluorescence images of MyoD1 and Myogenin staining in sarcomas developed from nude mice. Scale bar, 100  $\mu$ m. **B** Statistical analysis of Caldesmon, Desmin, Vimentin and  $\alpha$ -SMA in normal subcutaneous tissue (with WT MSC injection) and sarcomas (with SHP2<sup>E76K</sup> MSC injection) from nude mice (n=5 per group). Data are represented as the mean  $\pm$  SD. \* $p$  < 0.05, \*\* $p$  < 0.01, \*\*\*\* $p$  < 0.0001 (two-tailed unpaired  $t$  test). **C** Statistical analysis of Caldesmon, Desmin, Vimentin and  $\alpha$ -SMA in normal subcutaneous tissues (with WT MSC injection) and sarcomas (with SHP2<sup>E76K</sup> MSC injection) from C57BL/6 mice (n=5 per group). Data are represented as the mean  $\pm$  SD. \*\* $p$  < 0.01, \*\*\* $p$  < 0.001, \*\*\*\* $p$  < 0.0001 (two-tailed unpaired  $t$  test). **D** Representative immunofluorescence images of MyoD1 and Myogenin staining in sarcomas developed from C57BL/6 mice. Scale bar, 100  $\mu$ m.

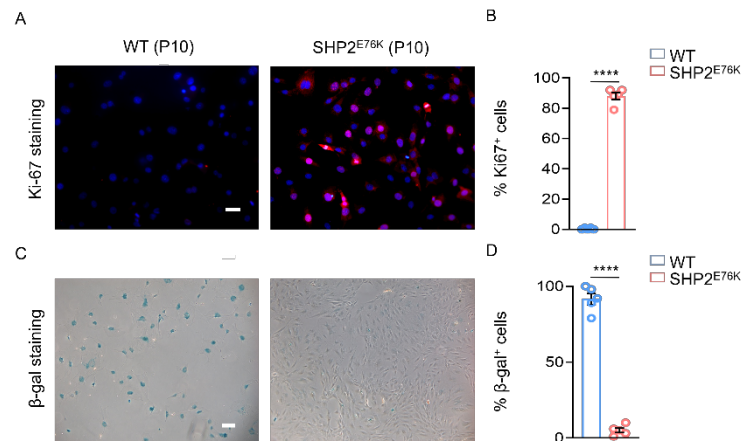

**Supplemental Figure 5. The proliferation capacity of SHP2<sup>E76K</sup> MSCs gradually accelerated, but WT MSCs progressively became senescent following successive passages. A, B** Representative immunofluorescence images (A) and statistical analysis (B) of Ki67 staining in WT and mutant MSCs at the indicated passages (n=5 per group). Scale bar, 200 μm. Data are represented as the means ± SD. \*\*\*\* $p < 0.00001$  (two-tailed unpaired t test). **C, D** Representative images (C) and statistical analysis (D) of β-gal staining in WT and mutant MSCs at the indicated passages (n=5 per group). Scale bar, 200 μm. Data are represented as the means ± SD. \*\*\*\* $p < 0.00001$  (two-tailed unpaired t test).

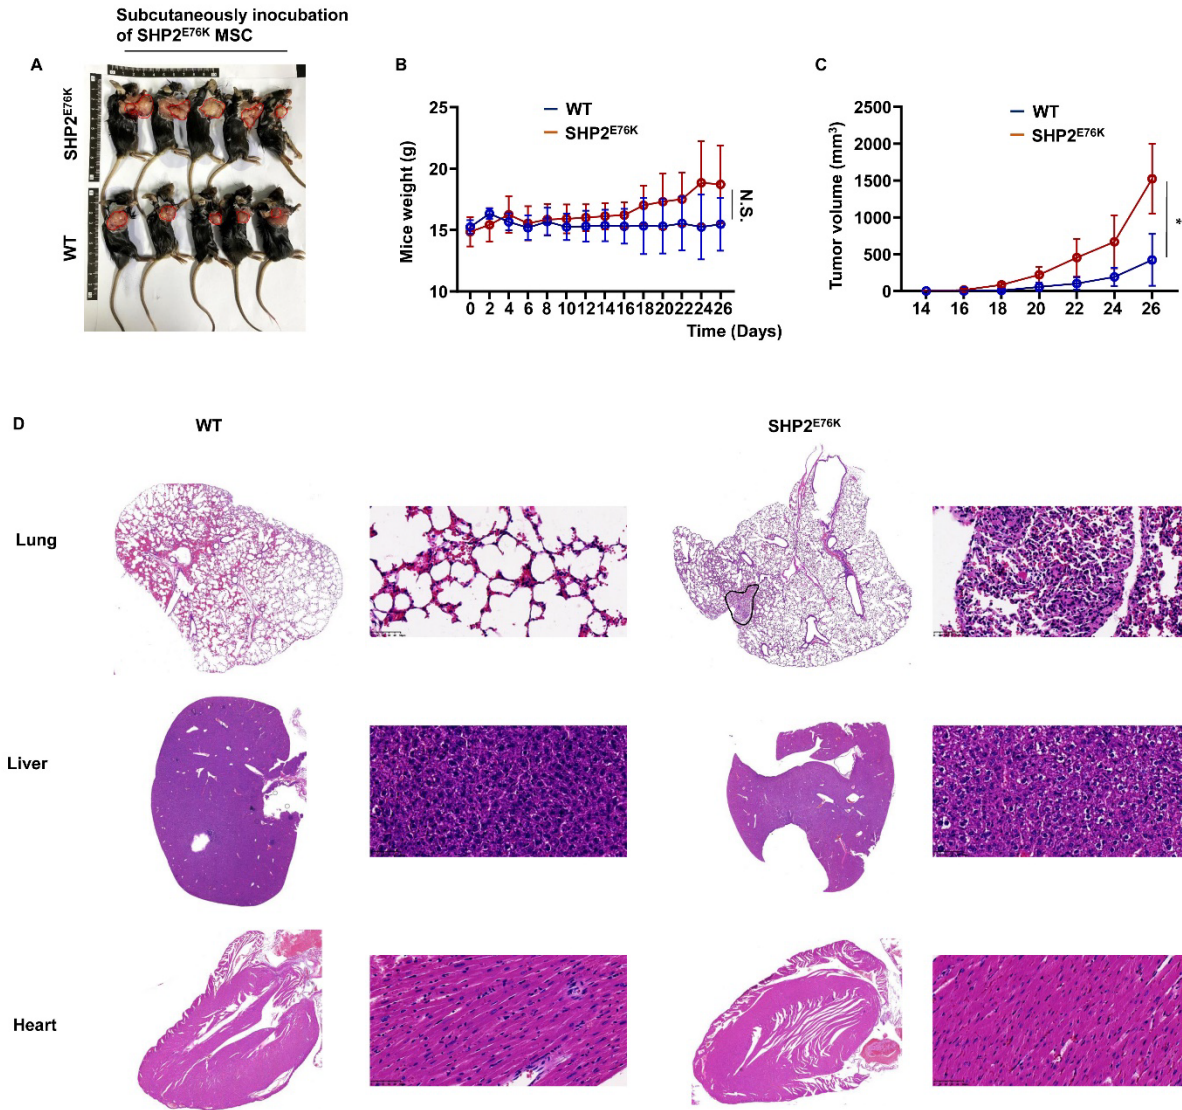

**Supplemental Figure 6. SHP2<sup>E76K</sup> MSCs can initiate sarcomagenesis and lung metastasis in C57BL/6 mice.** **A** Representative image of tumors in WT and Mx1-cre; SHP2<sup>E76K</sup> mice with SHP2<sup>E76K</sup> MSCs inoculation. **B, C** Statistical analysis of mice weight (**B**) and tumor volume (**C**) of WT and Mx1-cre; SHP2<sup>E76K</sup> mice (n=5 per group) with SHP2<sup>E76K</sup> MSCs inoculation at different time points. Data are represented as the means  $\pm$  SD. \* $p < 0.05$ , N.S. indicates no significance (two-tailed unpaired t test). **D** Representative HE staining images of Lung, liver and heart in C57BL/6 mice inoculated with WT or SHP2<sup>E76K</sup> MSCs. Scale bar, 50  $\mu$ m.

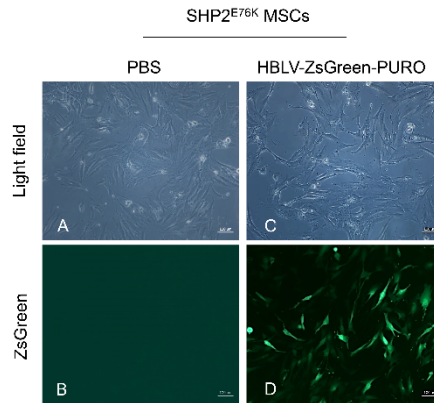

**Supplemental Figure 7. Lentivirus transfection of ZsGreen in SHP2<sup>E76K</sup> MSCs.** **A, B** Representative light field images (**A**) and fluorescence images (**B**) of SHP2<sup>E76K</sup> MSCs without lentivirus transfection. **C, D** Representative light field images (**C**) and fluorescence images (**D**) of SHP2<sup>E76K</sup> MSCs overexpressing ZsGreen. Scale bar, 100  $\mu$ m.

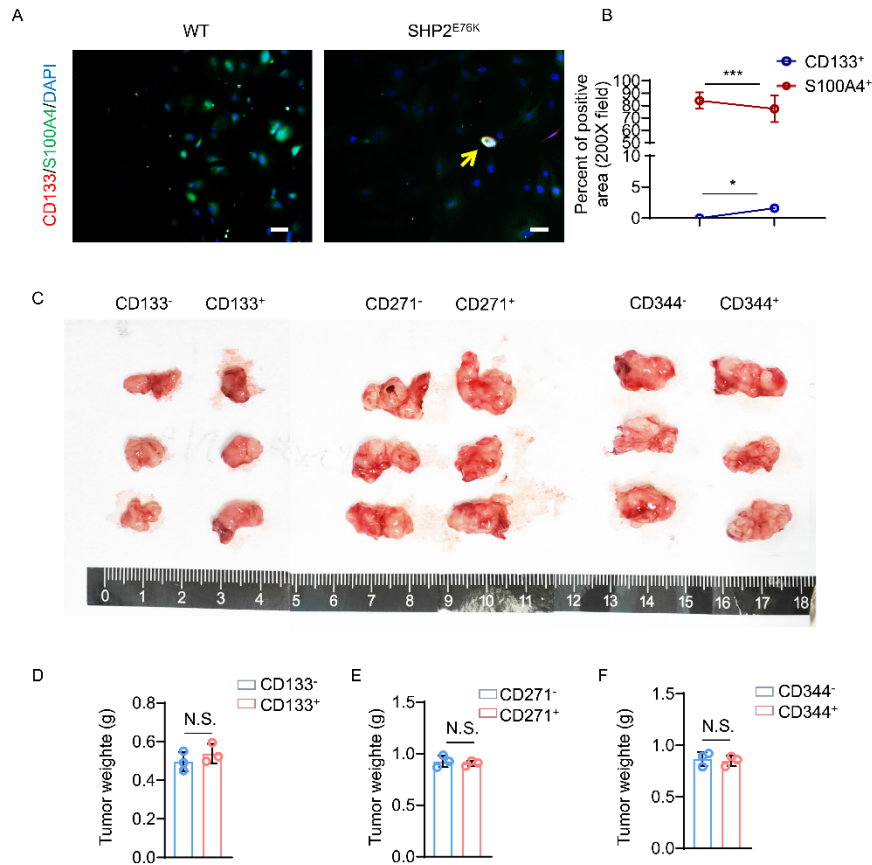

**Supplemental Figure 8 CD133, CD271 and CD344 positive cells did not exhibit difference in tumor progression among SHP2<sup>E76K</sup> MSCs.** **A, B** Representative IF staining images (**A**) and statistical analysis (**B**) of S100A4 and CD133 in WT and SHP2<sup>E76K</sup> MSCs. Scale bar, 200  $\mu$ m. Data are represented as the mean  $\pm$  SD. \* $p < 0.05$ , \*\*\* $p < 0.001$  (two-tailed unpaired  $t$  test). **C-F** Representative tumor images and statistical analysis of tumor developed by CD133<sup>-</sup>, CD133<sup>+</sup>, CD271<sup>-</sup>, CD271<sup>+</sup>, CD344<sup>-</sup> and CD344<sup>+</sup> SHP2<sup>E76K</sup> MSCs (n=3 per group).

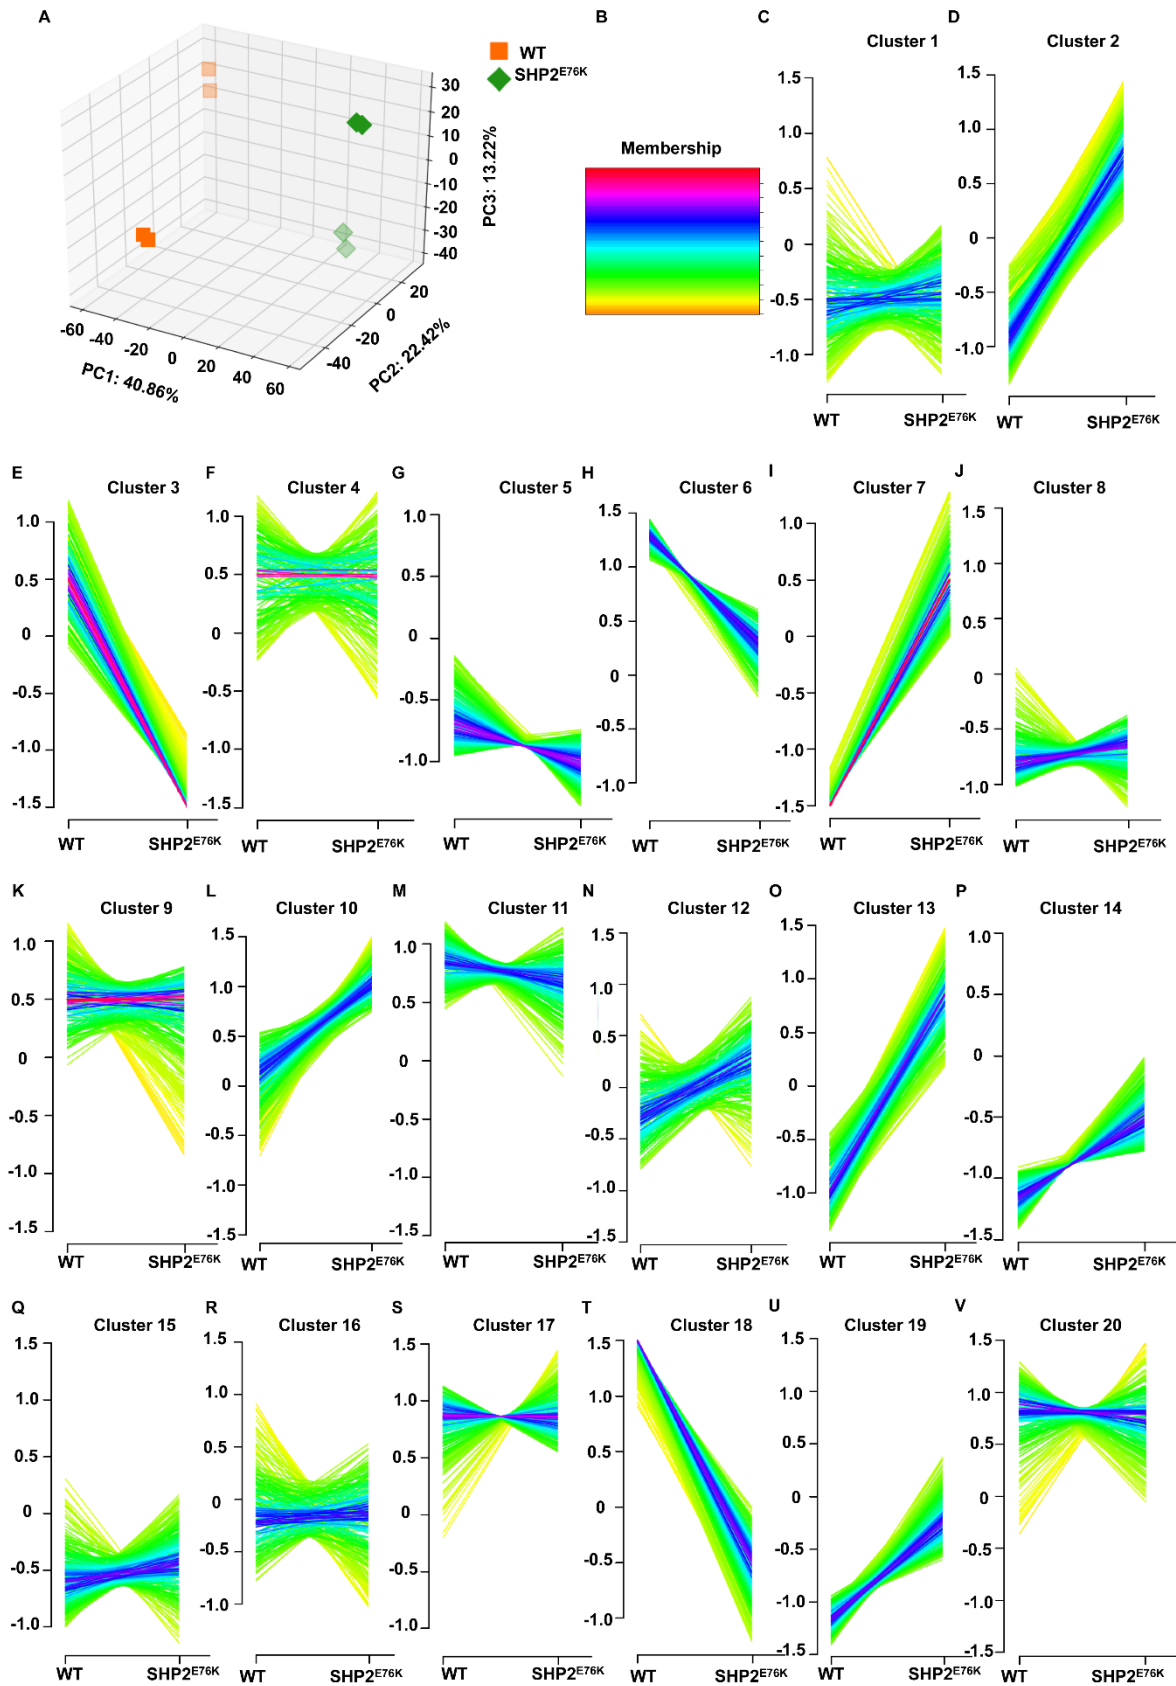

**Supplemental Figure 9** PCA and trend analysis of WT and SHP2<sup>E76K</sup> MSCs. **A** PCA of the WT and SHP2<sup>E76K</sup> MSCs. **B-V** Trend analysis of WT and SHP2<sup>E76K</sup> MSCs.

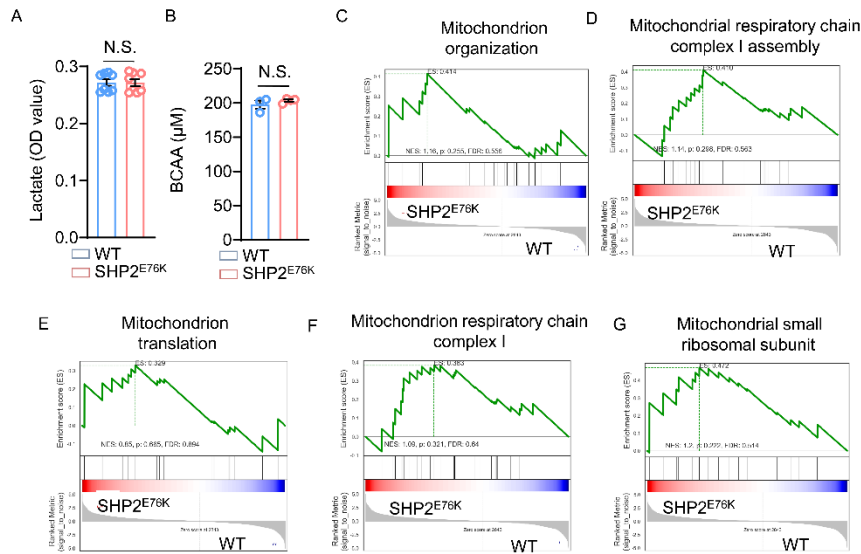

**Supplemental Figure 10. Some metabolic parameters of SHP2<sup>E76K</sup> MSCs did not change significantly, but mitochondria-associated proteins were enriched in SHP2<sup>E76K</sup> MSCs. A** Statistical analysis of the content of lactate in WT and SHP2<sup>E76K</sup> MSCs (n=8 per group). Data are represented as the means ± SD. N.S. indicates no significance (two-tailed unpaired *t* test). **B** Statistical analysis of the content of BCAA in WT and SHP2<sup>E76K</sup> MSCs (n=3 per group). Data are represented as the means ± SD. N.S. indicates no significance (two-tailed unpaired *t* test). **C-G** GSEA of mitochondria-associated proteins in WT and SHP2<sup>E76K</sup> MSCs.

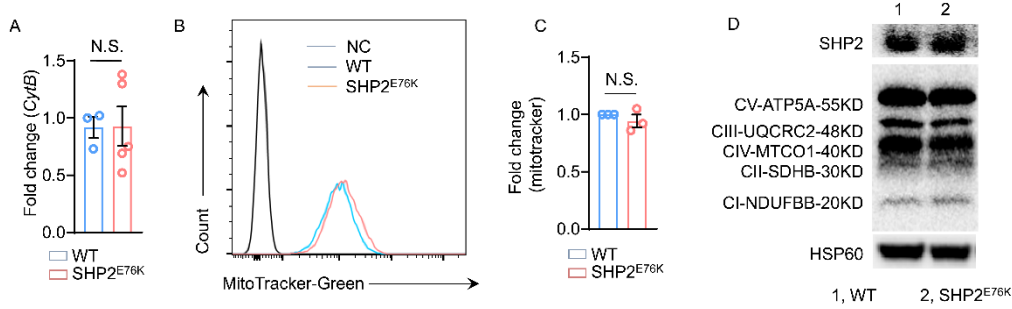

**Supplemental Figure 11. Mitochondrial biogenesis, gene expression and complex expression in SHP2<sup>E76K</sup> MSCs did not change significantly.** **A** Statistical analysis of *CytB* expression in WT and SHP2<sup>E76K</sup> MSCs (n=3 or 5 per group). Data are represented as the means  $\pm$  SD. N.S. indicates no significance (two-tailed unpaired *t* test). **B**, **C** Representative image of flow cytometry (**B**) and statistical analysis (**C**) of MitoTracker Green staining in WT and SHP2<sup>E76K</sup> MSCs using flow cytometry (n=3 per group). Data are represented as the means  $\pm$  SD. N.S. indicates no significance (two-tailed unpaired *t* test). **D** Western blot analysis of the expression of mitochondrial complex-associated proteins in WT and SHP2<sup>E76K</sup> MSCs.

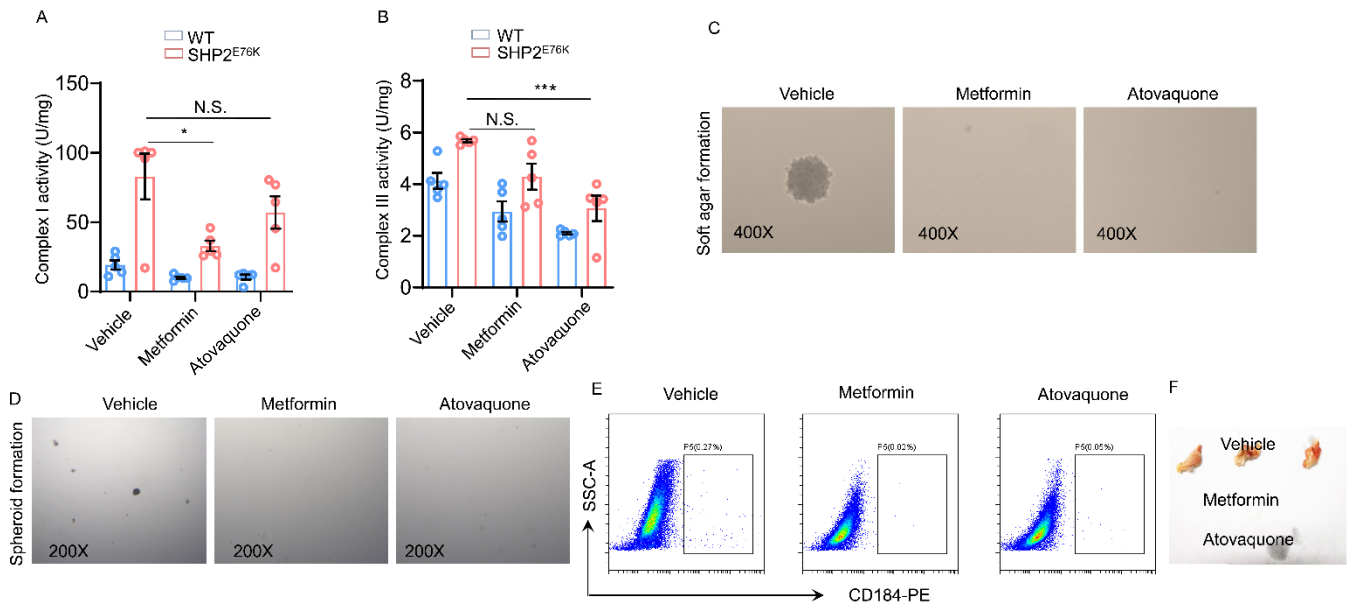

**Supplemental Figure 12. Metformin and atovaquone effectively inhibited the complex I and III activity and the population of CD184<sup>+</sup> cells in SHP2<sup>E76K</sup> MSCs.** **A, B** Statistical analysis of the activity of complexes I (**A**) and III (**B**) in WT and SHP2<sup>E76K</sup> MSCs following metformin and atovaquone treatment (n=5 per group). Data are represented as the means  $\pm$  SD. \* $p < 0.05$ , \*\*\* $p < 0.001$ , N.S. indicates no significance (Two-way ANOVA with multiple-comparison test). **C, D** Representative images of soft agar formation and spheroid formation of SHP2<sup>E76K</sup> MSCs with or without metformin and atovaquone treatment at indicated field. **E, F** Representative flow cytometry analysis of the population of CD184<sup>+</sup> cells and tumor formation of SHP2<sup>E76K</sup> MSCs with or without metformin and atovaquone treatment.

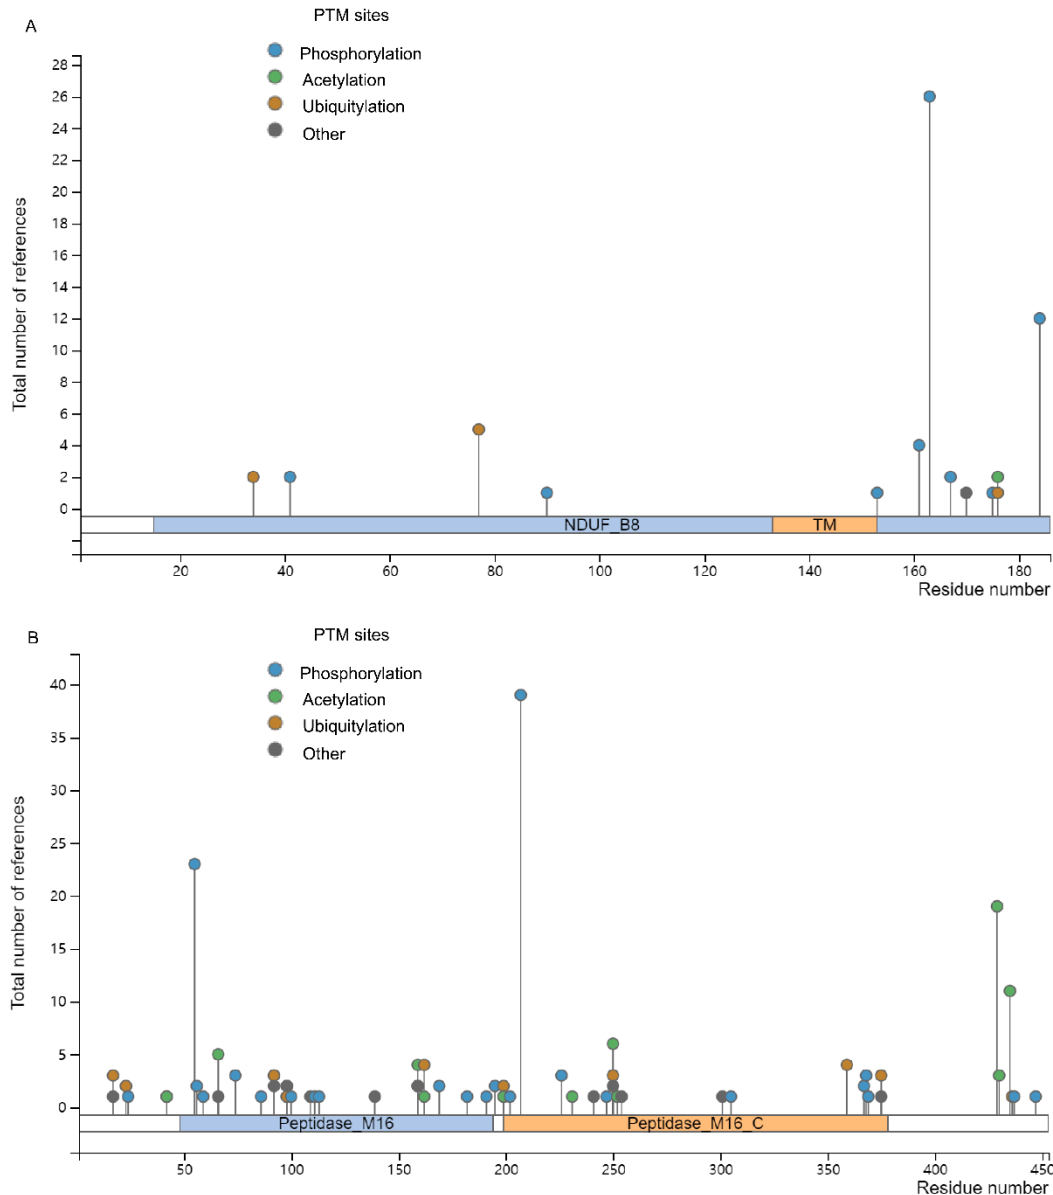

**Supplemental Figure 13. Protein posttranslational modification sites of NDUFB8 and UQCRC2. A** Protein posttranslational modification sites of NDUFB8, including phosphorylation, acetylation and ubiquitylation sites. **B** Protein posttranslational modification sites of UQCRC2, including phosphorylation, acetylation and ubiquitylation sites. Data are extracted from <https://www.phosphosite.org>.

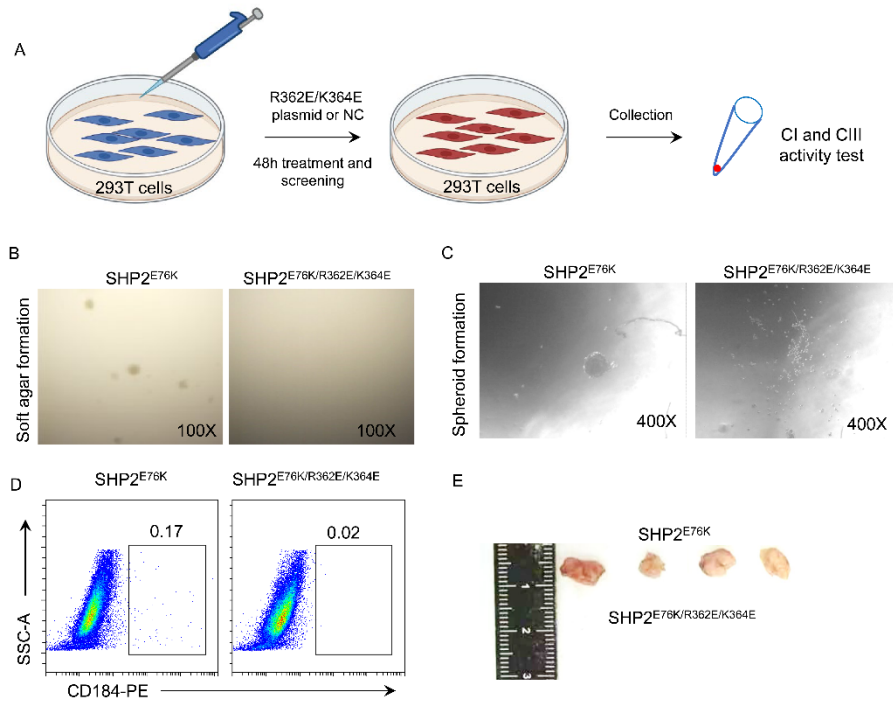

**Supplemental Figure 14. SHP2 LLPS-defective mutation rescues the malignancy of SHP2<sup>E76K</sup> MSCs.** **A** The Working flow that infection of SHP2 LLPS-defective mutation in 293T cells. **B, C** Representative soft agar images (**B**) and tumor spheroid formation (**C**) of SHP2<sup>E76K</sup> MSCs with or without R362E/K364E infection. **D, E** Representative flow cytometry analysis of CD184<sup>+</sup> cells (**D**) and tumor formation (**E**) of SHP2<sup>E76K</sup> MSCs infected with R362E/K364E plasmid.

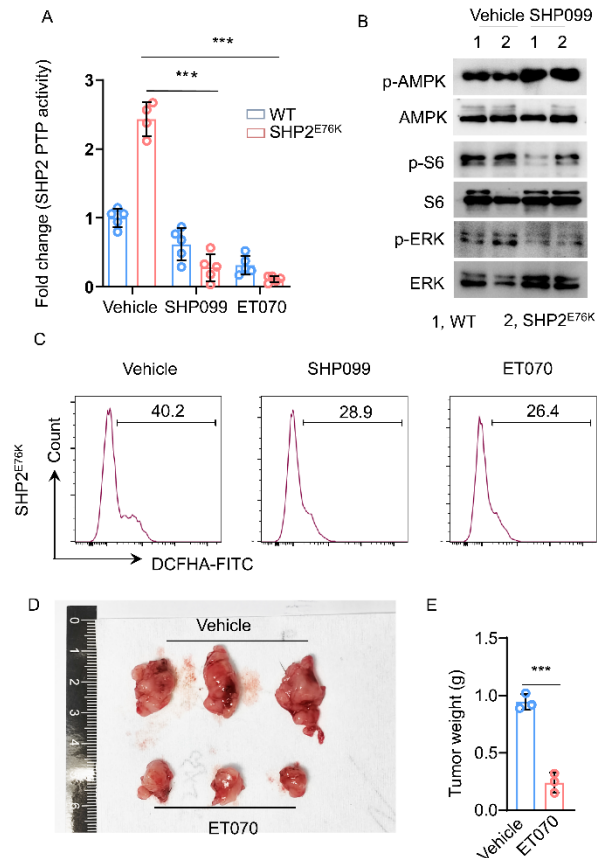

**Supplemental Figure 15. Alteration of SHP2 activity, downstream molecules and associated malignant cell behavior in SHP2<sup>E76K</sup> MSCs following treatment with SHP2 inhibitors.** **A** Statistical analysis of SHP2 activity in WT and SHP2<sup>E76K</sup> MSCs treated with SHP099 and ET070 (n= 5 per group). Data are represented as the means ± SD. \*\**p* < 0.01 (Two-way ANOVA with multiple-comparison test). **B** Representative western blot images of the AMPK and ERK pathways in WT and SHP2<sup>E76K</sup> MSCs treated with SHP099 or ET070. **C** Representative flow cytometry images of ROS levels of SHP2<sup>E76K</sup> MSCs treated with SHP099 or ET070. Images were captured at a 200X field. **D, E** Representative tumor images (**D**) and statistical analysis (**E**) of tumor developed by SHP2<sup>E76K</sup> MSCs treated with ET070 (n=3 per group). Data are represented as the means ± SD. \*\*\**p* < 0.001 (two-tailed unpaired t test).
