# Supplementary material
Source: JCI journal article supplement (doi:10.1172/jci170340)

Uncropped scans for Figure 6A

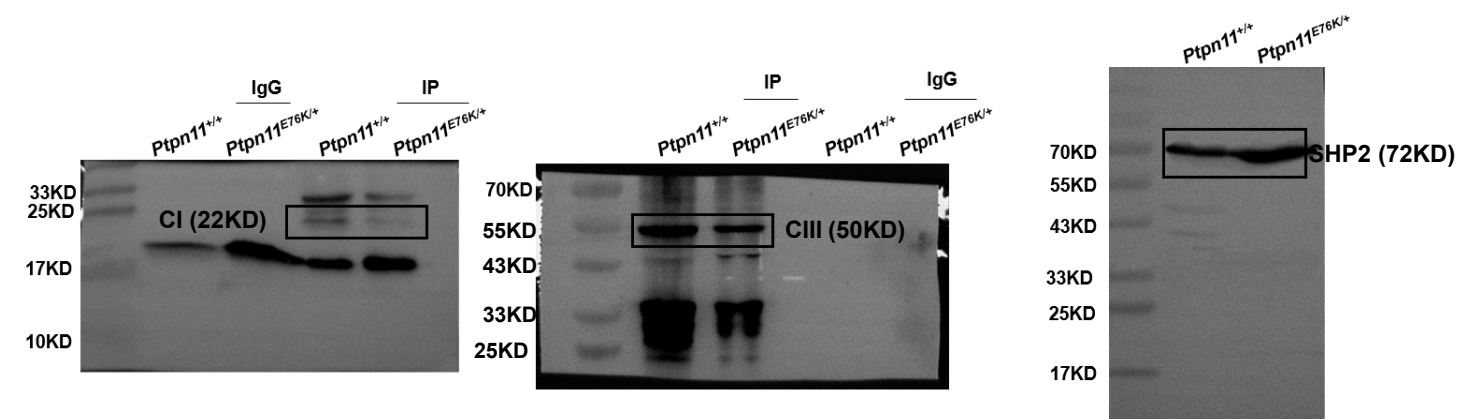

Uncropped scans for Figure 6G

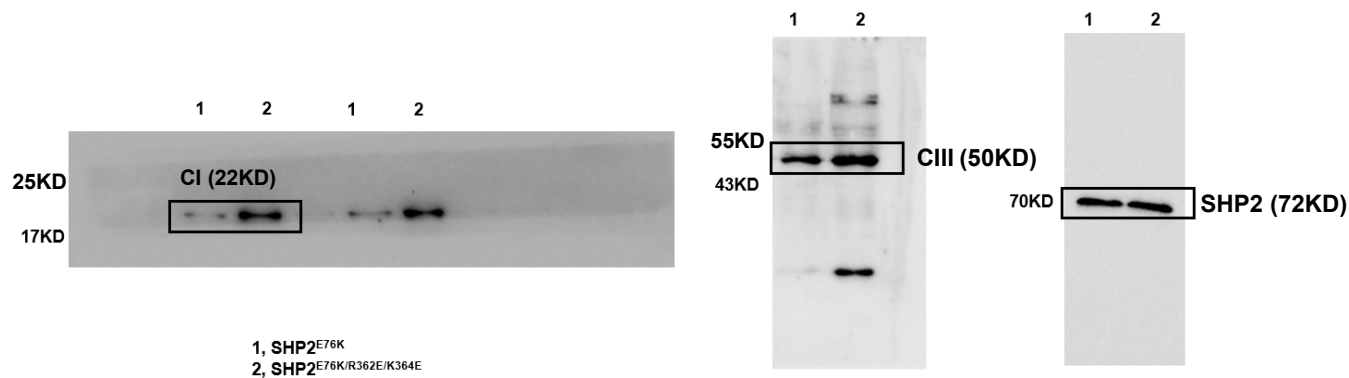

Uncropped scans for Figure 7D

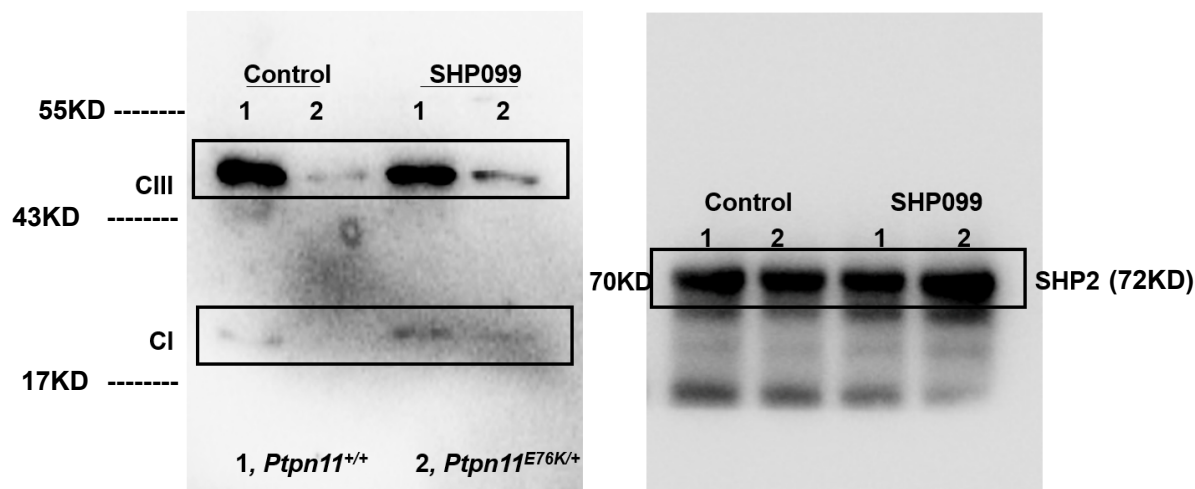

Uncropped scans for Supplemental Figure 1D

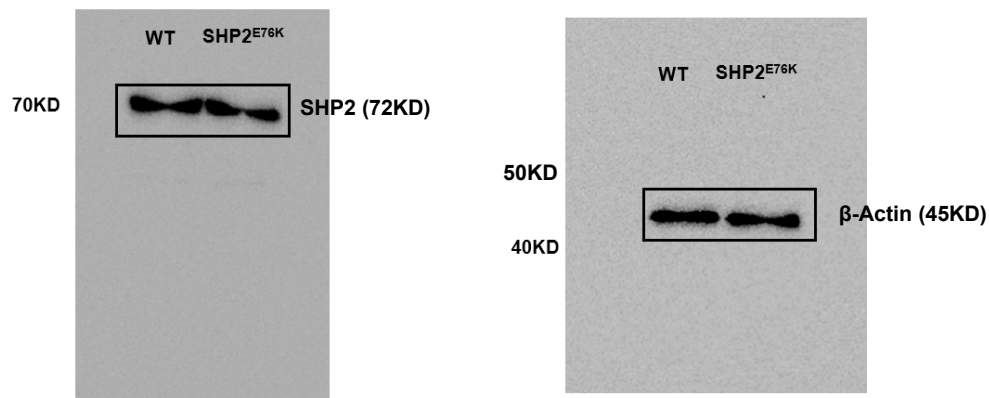

Uncropped scans for Supplemental Figure 11D

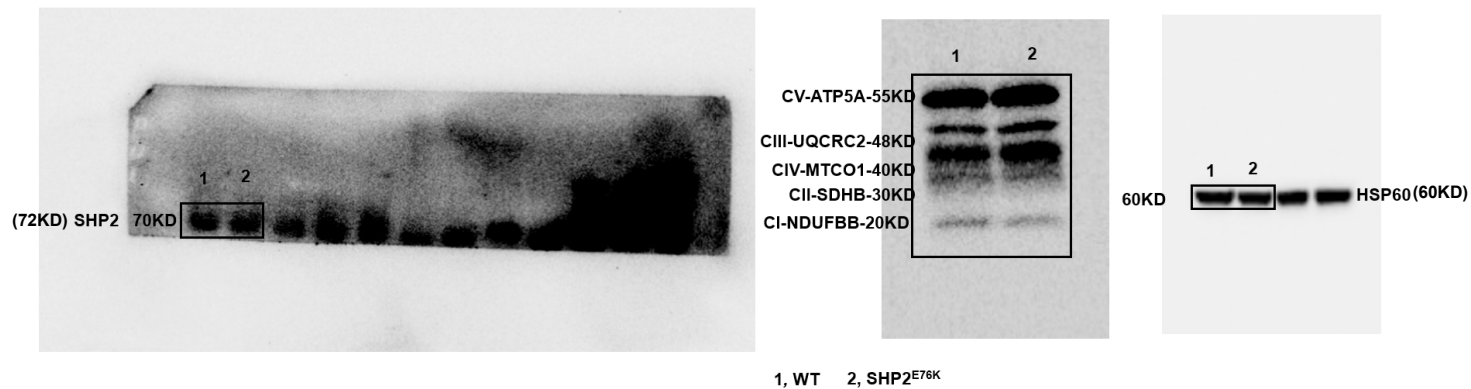

Uncropped scans for Supplemental Figure 15B

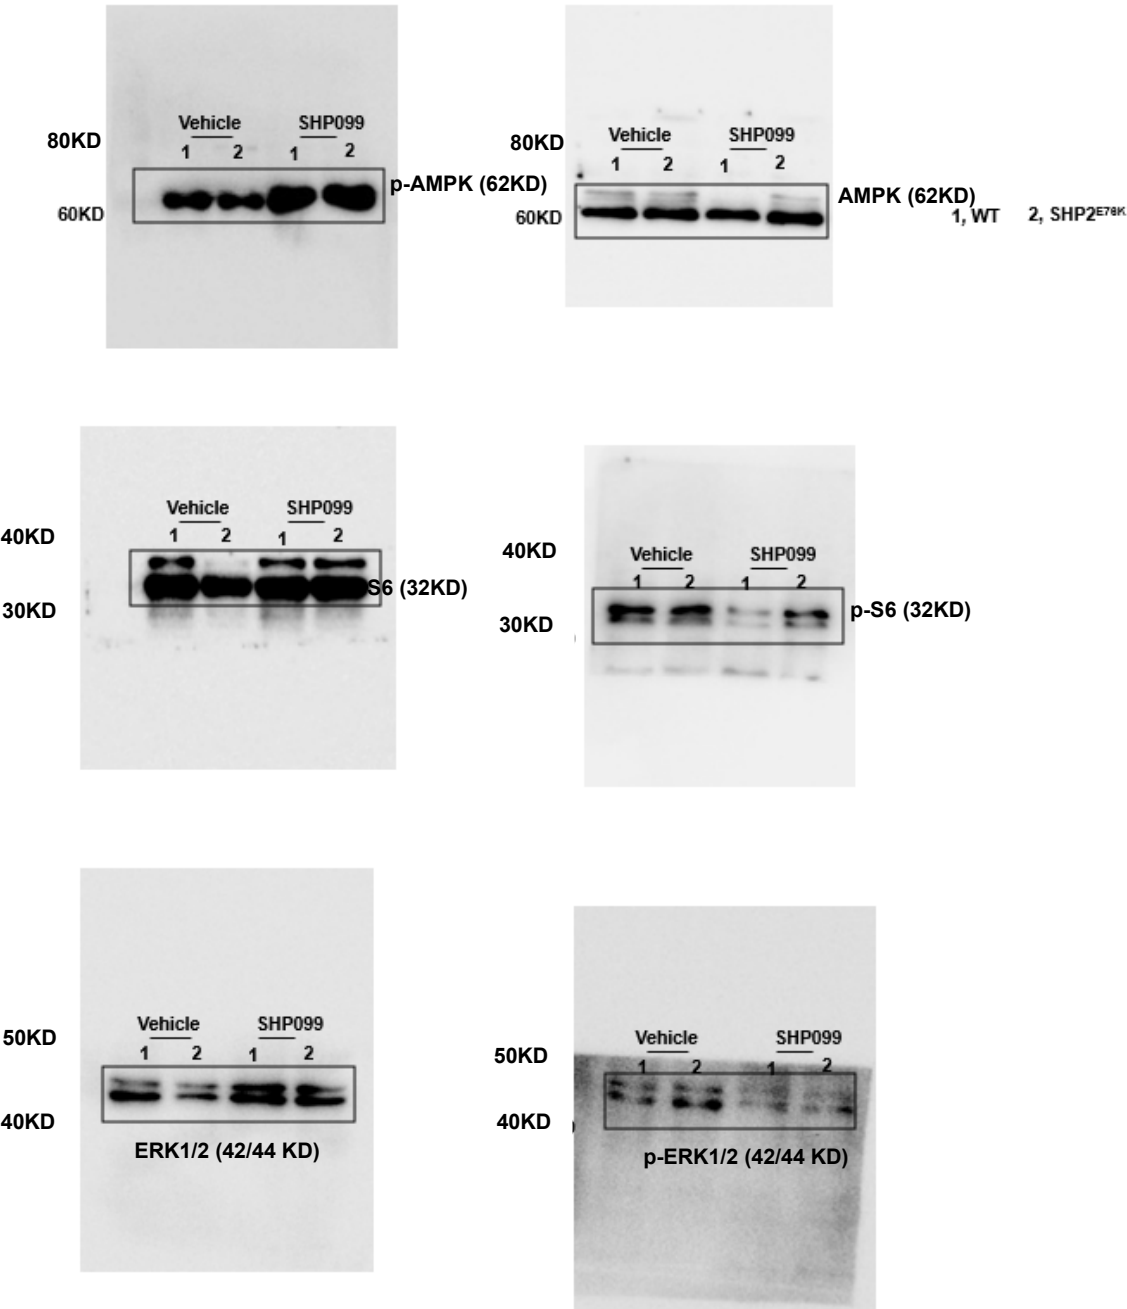

Supplement: sd2 [file 2]
